# Supplementary material for: Depression Screening of Perinatal Women by the Des Moines Healthy Start Project: Program Description and Evaluation
Source: Atypon-hosted journal article supplement (doi:10.1176/appi.ps.201100247), 2012-03-01
Supplement: pss6303_0250_ds.pdf [file pss6303_0250_ds.pdf]

DEPRESSION SCREENING: DES MOINES HEALTHY START

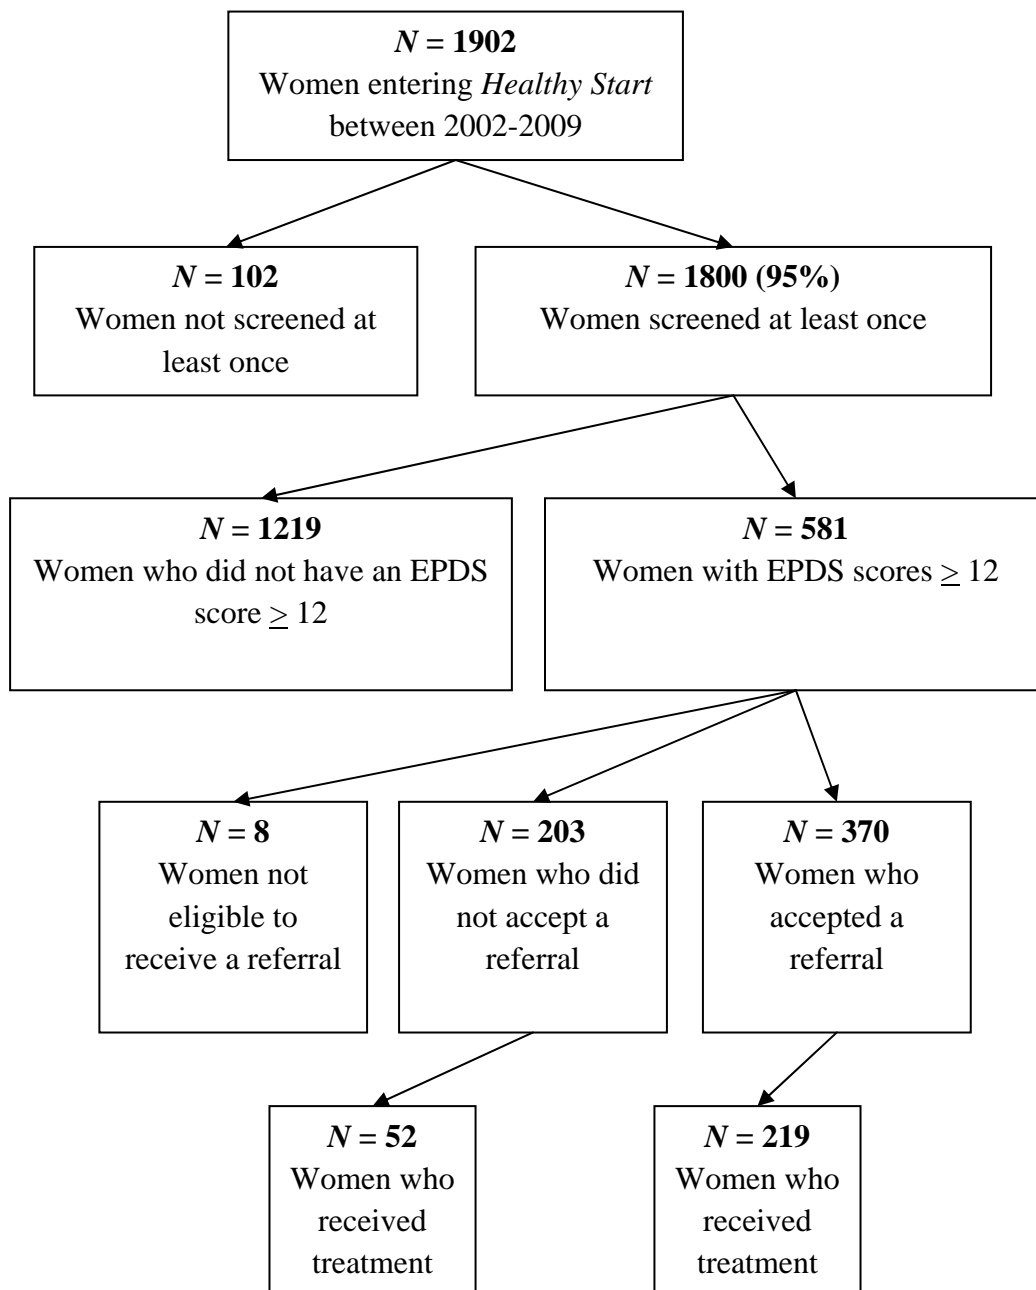

Figure 1. Flowchart of women in the Healthy Start program
